# Supplementary material
Source: PubMed Central journal article supplement (PMC3117061)
Supplement: NIHMS228300-supplement-1.pdf [file NIHMS228300-supplement-1.pdf]

Table S1. Frequency of other *OPRM1* SNPs studied and ethnic/racial group.

|                                            |          | White | Hispanic | African-American |
|--------------------------------------------|----------|-------|----------|------------------|
| SNP                                        | Genotype |       |          |                  |
| rs17174638,<br>5' UTR,<br>-111 C>T         | CC       | 161   | 174      | 570              |
|                                            | CT       | 0     | 8        | 116              |
|                                            | TT       | 0     | 0        | 10               |
| rs1799971,<br>exon 1,<br>118A>G,<br>N40D   | AA       | 117   | 135      | 651              |
|                                            | AG       | 41    | 44       | 41               |
|                                            | GG       | 3     | 3        | 2                |
| rs17174801,<br>exon 2,<br>454A>G,<br>N152D | AA       | 161   | 182      | 684              |
|                                            | AG       | 0     | 0        | 13               |
|                                            | GG       | 0     | 0        | 0                |
| rs1799974,<br>exon 3,<br>779G>A,<br>R260H  | AA       | 0     | 0        | 0                |
|                                            | AG       | 0     | 2        | 1                |
|                                            | GG       | 161   | 179      | 696              |
| rs17174822,<br>exon 3,<br>793C>T,<br>S265P | CC       | 161   | 182      | 685              |
|                                            | CT       | 0     | 0        | 12               |
|                                            | TT       | 0     | 0        | 0                |
